# Supplementary material for: Towards the use of cannabinoids as antitumour agents
Source: Springer Nature journal article supplement (doi:10.1038/nrc3247), 2012-05-04
Supplement: 41568_2012_BFnrc3247_MOESM197_ESM.pdf [file 41568_2012_BFnrc3247_MOESM197_ESM.pdf]

Supplementary Table S1 | **Cannabinoid activity in animal models of cancer**

| MODEL                       | TUMOUR TYPE                  | EXPERIMENTAL SYSTEM                             | EFFECT                                                                                        | CANNABINOID                                             | RECEPTOR                     | REFS     |    |
|-----------------------------|------------------------------|-------------------------------------------------|-----------------------------------------------------------------------------------------------|---------------------------------------------------------|------------------------------|----------|----|
| <b>ANTI-TUMOUR ACTIONS</b>  |                              |                                                 |                                                                                               |                                                         |                              |          |    |
| <b>SYNGENEIC TUMOURS</b>    |                              |                                                 |                                                                                               |                                                         |                              |          |    |
| <b>Ectopic isografts</b>    | Lung carcinoma*              | IM injection of cancer cells; IC mice           | Decreased tumour size, increased survival time                                                | $\Delta^9$ -THC, $\Delta^8$ -THC, CBN                   | n.d.                         | 1        |    |
|                             | Lymphoma                     | IP injection of cancer cells; IC mice           | Decreased viable IP tumour cells, increased survival time (apoptosis)                         | $\Delta^9$ -THC, CBD                                    | CB2                          | 2, 3     |    |
|                             | Skin carcinoma*              | SC injection of cancer cells; ID mice           | Decreased tumour size (apoptosis and angiogenesis)                                            | WIN 55212-2, JWH-133                                    | CB1, CB2                     | 4        |    |
|                             | Melanoma                     | SC injection of cancer cells; ID and IC mice    | Decreased tumour size (apoptosis, inhibition of proliferation and angiogenesis)               | WIN 55212-2, JWH-133                                    | CB1, CB2                     | 5        |    |
| <b>Orthotopic isografts</b> | Breast carcinoma             | SC injection of cancer cells; ID mice           | Decreased tumour size (inhibition of proliferation, apoptosis)                                | $\Delta^9$ -THC, JWH-133                                | CB2                          | 6        |    |
|                             | Breast carcinoma             | IMG injection of cancer cells; IC mice          | Decreased tumour size, reduced lung metastases (inhibition of proliferation and invasiveness) | CBD, JWH-015                                            | n.d.                         | 7, 8     |    |
| <b>ALLOGENIC TUMOURS</b>    |                              |                                                 |                                                                                               |                                                         |                              |          |    |
| <b>Ectopic xenografts</b>   | Glioma                       | SC injection of cancer cells; ID mice           | Decreased tumour size (apoptosis, inhibition of angiogenesis, migration and invasiveness)     | $\Delta^9$ -THC, JWH-133, WIN 55212-2, CBD              | CB1, CB2                     | 9-19     |    |
|                             | Thyroid epithelioma          |                                                 | Decreased tumour size (inhibition of proliferation, apoptosis)                                | MET-AEA, 2-AG, CBD                                      | CB1, CB2                     | 20-23    |    |
|                             | Pancreatic carcinoma         |                                                 | Decreased tumour size                                                                         | $\Delta^9$ -THC, JWH-133                                | CB2                          | 24       |    |
|                             | Breast carcinoma             |                                                 | Decreased tumour size (apoptosis, inhibition of proliferation and angiogenesis)               | JWH-133, WIN 55212-2                                    | CB1, CB2                     | 25       |    |
|                             | Lung carcinoma               |                                                 | Decreased tumour size (apoptosis, inhibition of proliferation, invasiveness and angiogenesis) | $\Delta^9$ -THC, JWH-133, WIN 55212-2, CBD              | CB1, CB2, TRPV1              | 26-29    |    |
|                             | Lymphoma                     |                                                 | Decreased tumour size (inhibition of proliferation, apoptosis)                                | MET-AEA                                                 | CB1, CB2                     | 30       |    |
|                             | Cholangio-carcinoma          |                                                 | Decreased tumour size (inhibition of proliferation, apoptosis)                                | AEA                                                     | GPR55                        | 31-33    |    |
|                             | Colon carcinoma              |                                                 | Decreased tumour size (apoptosis)                                                             | CB-13                                                   | CB1, CB2                     | 34       |    |
|                             | Rhabdomyo-sarcoma            |                                                 | Decreased tumour size (apoptosis)                                                             | HU-210                                                  | CB1                          | 35       |    |
|                             | Prostate carcinoma           |                                                 | Decreased tumour size (inhibition of proliferation, apoptosis)                                | JWH-015                                                 | CB2                          | 36       |    |
|                             | Oral carcinoma               |                                                 | Decreased tumour size (inhibition of proliferation)                                           | AM-1241                                                 | CB2                          | 37       |    |
|                             | Hepatocellular carcinoma     |                                                 | Decreased tumour growth (apoptosis)                                                           | $\Delta^9$ -THC, JWH-015                                | CB2                          | 38       |    |
|                             | Transformed MEFs             | SC injection of transformed cells; ID mice      | Decreased tumour size (apoptosis)                                                             | $\Delta^9$ -THC                                         | CB1, CB2                     | 11, 13   |    |
|                             | <b>Orthotopic xenografts</b> | Glioma                                          | Intracerebral injection of cancer cells; rats                                                 | Decreased tumour size, increased survival (apoptosis)   | $\Delta^9$ -THC, WIN 55212-2 | CB1, CB2 | 12 |
|                             |                              | Pancreatic carcinoma                            | Intrapancreatic injection of cancer cells; ID mice                                            | Decreased tumour growth, reduced metastases (apoptosis) | WIN 55212-2                  | CB2      | 24 |
| Hepatocellular carcinoma    |                              | Intrahepatic injection of cancer cells; ID mice | Reduced hepatomegaly and ascites (apoptosis)                                                  | $\Delta^9$ -THC, JWH-015                                | CB2                          | 38       |    |

| CHEMICALLY-INDUCED CARCINOGENESIS              |                   |                                                                                                        |                                                                                                                                           |                                                     |                 |                   |
|------------------------------------------------|-------------------|--------------------------------------------------------------------------------------------------------|-------------------------------------------------------------------------------------------------------------------------------------------|-----------------------------------------------------|-----------------|-------------------|
|                                                | Colon cancer      | Azoxymethane treatment; C57BL/6 mice                                                                   | Decreased aberrant crypt foci (apoptosis)                                                                                                 | HU-210                                              | n.d.            | 39                |
| GENETICALLY-ENGINEERED MICE                    |                   |                                                                                                        |                                                                                                                                           |                                                     |                 |                   |
|                                                | Colorectal cancer | Apc <sup>Min/+</sup> mice                                                                              | Reduced number of tumours (apoptosis)                                                                                                     | R-1                                                 | CB1             | 40                |
|                                                | Breast cancer     | Heterozygous PyMT mice                                                                                 | Increased tumour latency, decreased tumour size (apoptosis, inhibition of proliferation, angiogenesis, migration and invasiveness)        | JWH-133                                             | CB2             | 8, 25             |
|                                                |                   | MMTV-neu mice                                                                                          | Inhibition of tumour generation, decreased tumour size, reduced lung metastases (apoptosis, inhibition of proliferation and angiogenesis) | $\Delta^9$ -THC, JWH-133                            | CB2             | 6                 |
| MODELS OF METASTASIS                           |                   |                                                                                                        |                                                                                                                                           |                                                     |                 |                   |
| <b>Intravenous injection of tumour cells</b>   | Lung carcinoma    | Mouse cells: paw injection, IC mice<br>Human cells: tail vein injection, ID mice                       | Reduced lung metastases (inhibition of invasiveness)                                                                                      | $\Delta^9$ -THC, JWH-133, WIN 55212-2, CBD, MET-AEA | CB1, CB2, TRPV1 | 21, 26, 27, 41    |
|                                                | Breast carcinoma  | Mouse cells: paw and tail vein injection, IC mice<br>Human cells: paw and tail vein injection; IC mice | Reduced lung metastases (inhibition of proliferation, adhesion, migration and invasion)                                                   | JWH-133, WIN 55212-2, MET-AEA, CBD                  | CB1, CB2        | 7, 23, 25, 42, 43 |
|                                                | Melanoma          | Mouse cells: paw injection, IC mice                                                                    | Reduced lung and liver metastases                                                                                                         | WIN 55212-2                                         | n.d.            | 5                 |
| <b>Originated from an orthotopic xenograft</b> | Pancreatic cancer | Orthotopic xenograft; ID mice                                                                          | Reduced spleen, liver, diaphragm, intestine and stomach metastases (apoptosis)                                                            | $\Delta^9$ -THC, JWH-133                            | CB2             | 24                |
| <b>Derived from a primary tumour</b>           | Breast cancer     | MMTV-neu mice, Orthotopic isograft                                                                     | Reduced lung metastases (inhibition of proliferation and invasiveness)                                                                    | $\Delta^9$ -THC, JWH-133, CBD                       | CB2             | 6, 7              |
| PRO-TUMOUR ACTIONS                             |                   |                                                                                                        |                                                                                                                                           |                                                     |                 |                   |
| SYNGENEIC TUMOURS                              |                   |                                                                                                        |                                                                                                                                           |                                                     |                 |                   |
| <b>Ectopic isografts</b>                       | Lung carcinoma*   | SC injection of cancer cells; IC mice                                                                  | Increased tumour size (inhibition of anti-tumour immune response)                                                                         | $\Delta^9$ -THC, MET-AEA                            | CB2             | 44, 45            |
|                                                | Breast carcinoma  |                                                                                                        | Increased tumour size (inhibition of anti-tumour immune response)                                                                         | $\Delta^9$ -THC                                     | CB2             | 46                |
| MODELS OF METASTASIS                           |                   |                                                                                                        |                                                                                                                                           |                                                     |                 |                   |
| <b>Originated from an ectopic isograft</b>     | Breast carcinoma  | Ectopic isograft; IC mice                                                                              | Increased number and size of lung metastases (inhibition of anti-tumour immune response)                                                  | $\Delta^9$ -THC                                     | CB2             | 24, 46            |

The table shows the different animal models of cancer in which the indicated cannabinoids have been proved to have pro- or anti-tumour effects. The membrane receptors involved in these actions are also specified. Note, nonetheless, that not all the indicated effects are produced by all the agonists, and that not all the indicated agonists are capable of activating (all) the indicated receptor(s).

\*Although the cancer cell line used was of mouse origin, it was not injected in strictly syngeneic mice but in a different mouse strain.

IM, intramuscular; SC, subcutaneous; IMG, intramammary gland; IC, immunocompetent; ID, immunodeficient; MEFs, mouse embryonic fibroblasts; n.d., not determined. CB<sub>1</sub>, cannabinoid receptor 1; CB<sub>2</sub>, cannabinoid receptor 2; TRPV1, transient receptor potential cation channel 1; GPR55, G protein-coupled receptor 55.  $\Delta^9$ -THC ( $\Delta^9$ -tetrahydrocannabinol),  $\Delta^8$ -THC ( $\Delta^8$ -tetrahydrocannabinol), CBN (cannabinol), WIN 55212-2, MET-AEA (methanandamide), 2-AG (2-arachidonoylglycerol), CB-13 and HU-210 are CB<sub>1</sub>/CB<sub>2</sub>-mixed agonists; JWH-133, JWH-015 and AM-1241 are CB<sub>2</sub>-selective agonists and R-1 is a CB<sub>1</sub>-selective agonist. CBD (cannabidiol) does not bind to either CB<sub>1</sub> or CB<sub>2</sub> receptors with significant affinity.

## REFERENCES

1. Munson, A.E., Harris, L.S., Friedman, M.A., Dewey, W.L. & Carchman, R.A. Antineoplastic activity of cannabinoids. *J Natl Cancer Inst* **55**, 597-602 (1975).
2. McKallip, R.J. et al. Targeting CB2 cannabinoid receptors as a novel therapy to treat malignant lymphoblastic disease. *Blood* **100**, 627-34 (2002).
3. McKallip, R.J. et al. Cannabidiol-induced apoptosis in human leukemia cells: A novel role of cannabidiol in the regulation of p22phox and Nox4 expression. *Mol Pharmacol* **70**, 897-908 (2006).
4. Casanova, M.L. et al. Inhibition of skin tumor growth and angiogenesis in vivo by activation of cannabinoid receptors. *J Clin Invest* **111**, 43-50 (2003).
5. Blazquez, C. et al. Cannabinoid receptors as novel targets for the treatment of melanoma. *FASEB J* **20**, 2633-5 (2006).
6. Caffarel, M.M. et al. Cannabinoids reduce ErbB2-driven breast cancer progression through Akt inhibition. *Mol Cancer* **9**, 196 (2010).
7. McAllister, S.D. et al. Pathways mediating the effects of cannabidiol on the reduction of breast cancer cell proliferation, invasion, and metastasis. *Breast Cancer Res Treat* (2011).
8. Nasser, M.W. et al. Crosstalk between chemokine receptor CXCR4 and cannabinoid receptor CB2 in modulating breast cancer growth and invasion. *PLoS One* **6**, e23901 (2011).
9. Blazquez, C. et al. Inhibition of tumor angiogenesis by cannabinoids. *FASEB J* **17**, 529-31 (2003).
10. Blazquez, C. et al. Cannabinoids inhibit glioma cell invasion by down-regulating matrix metalloproteinase-2 expression. *Cancer Res* **68**, 1945-52 (2008).
11. Carracedo, A. et al. The stress-regulated protein p8 mediates cannabinoid-induced apoptosis of tumor cells. *Cancer Cell* **9**, 301-12 (2006).
12. Galve-Roperh, I. et al. Anti-tumoral action of cannabinoids: involvement of sustained ceramide accumulation and extracellular signal-regulated kinase activation. *Nat Med* **6**, 313-9 (2000).
13. Salazar, M. et al. Cannabinoid action induces autophagy-mediated cell death through stimulation of ER stress in human glioma cells. *J Clin Invest* **119**, 1359-72. (2009).
14. Massi, P. et al. Antitumor effects of cannabidiol, a nonpsychoactive cannabinoid, on human glioma cell lines. *J Pharmacol Exp Ther* **308**, 838-45 (2004).
15. Sanchez, C. et al. Inhibition of glioma growth in vivo by selective activation of the CB<sub>2</sub> cannabinoid receptor. *Cancer Res* **61**, 5784-9 (2001).
16. Blazquez, C. et al. Cannabinoids inhibit the vascular endothelial growth factor pathway in gliomas. *Cancer Res* **64**, 5617-23 (2004).
17. Blazquez, C. et al. Down-regulation of tissue inhibitor of metalloproteinases-1 in gliomas: a new marker of cannabinoid antitumoral activity? *Neuropharmacology* **54**, 235-43 (2008).
18. Lorente, M. et al. Amphiregulin is a factor for resistance of glioma cells to cannabinoid-induced apoptosis. *Glia* **57**, 1374-85 (2009).
19. Torres, S. et al. A combined preclinical therapy of cannabinoids and temozolomide against glioma. *Mol Cancer Ther* **10**, 90-103 (2011).
20. Bifulco, M. et al. Control by the endogenous cannabinoid system of ras oncogene-dependent tumor growth. *FASEB J* **15**, 2745-7 (2001).
21. Portella, G. et al. Inhibitory effects of cannabinoid CB1 receptor stimulation on tumor growth and metastatic spreading: actions on signals involved in angiogenesis and metastasis. *FASEB J* **17**, 1771-3 (2003).
22. Bifulco, M. et al. A new strategy to block tumor growth by inhibiting endocannabinoid inactivation. *FASEB J* **18**, 1606-8 (2004).
23. Ligresti, A. et al. Antitumor activity of plant cannabinoids with emphasis on the effect of cannabidiol on human breast carcinoma. *J Pharmacol Exp Ther* **318**, 1375-87 (2006).
24. Carracedo, A. et al. Cannabinoids induce apoptosis of pancreatic tumor cells via endoplasmic reticulum stress-related genes. *Cancer Res* **66**, 6748-55 (2006).
25. Qamri, Z. et al. Synthetic cannabinoid receptor agonists inhibit tumor growth and metastasis of breast cancer. *Mol Cancer Ther* **8**, 3117-29 (2009).

26. Preet, A., Ganju, R.K. & Groopman, J.E.  $\Delta^9$ -Tetrahydrocannabinol inhibits epithelial growth factor-induced lung cancer cell migration in vitro as well as its growth and metastasis in vivo. *Oncogene* **27**, 339-46 (2008).
27. Preet, A. et al. Cannabinoid receptors, CB1 and CB2, as novel targets for inhibition of non-small cell lung cancer growth and metastasis. *Cancer Prev Res (Phila)* **4**, 65-75 (2011).
28. Ramer, R., Merkord, J., Rohde, H. & Hinz, B. Cannabidiol inhibits cancer cell invasion via upregulation of tissue inhibitor of matrix metalloproteinases-1. *Biochem Pharmacol* **79**, 955-66 (2010).
29. Ramer, R., Rohde, A., Merkord, J., Rohde, H. & Hinz, B. Decrease of plasminogen activator inhibitor-1 may contribute to the anti-invasive action of cannabidiol on human lung cancer cells. *Pharm Res* **27**, 2162-74 (2010).
30. Gustafsson, K. et al. Expression of cannabinoid receptors type 1 and type 2 in non-Hodgkin lymphoma: growth inhibition by receptor activation. *Int J Cancer* **123**, 1025-33 (2008).
31. Huang, L. et al. Anandamide exerts its antiproliferative actions on cholangiocarcinoma by activation of the GPR55 receptor. *Lab Invest* **91**, 1007-1017 (2011).
32. DeMorrow, S. et al. Anandamide inhibits cholangiocyte hyperplastic proliferation via activation of thioredoxin 1/redox factor 1 and AP-1 activation. *Am J Physiol Gastrointest Liver Physiol* **294**, G506-19 (2008).
33. Frampton, G., Coufal, M., Li, H., Ramirez, J. & DeMorrow, S. Opposing actions of endocannabinoids on cholangiocarcinoma growth is via the differential activation of Notch signaling. *Exp Cell Res* **316**, 1465-78 (2010).
34. Cianchi, F. et al. Cannabinoid receptor activation induces apoptosis through tumor necrosis factor alpha-mediated ceramide de novo synthesis in colon cancer cells. *Clin Cancer Res* **14**, 7691-700 (2008).
35. Oesch, S. et al. Cannabinoid receptor 1 is a potential drug target for treatment of translocation-positive rhabdomyosarcoma. *Mol Cancer Ther* **8**, 1838-45 (2009).
36. Olea-Herrero, N., Vara, D., Malagarie-Cazenave, S. & Diaz-Laviada, I. Inhibition of human tumour prostate PC-3 cell growth by cannabinoids R(+)-Methanandamide and JWH-015: involvement of CB2. *Br J Cancer* **101**, 940-50 (2009).
37. Saghafi, N., Lam, D.K. & Schmidt, B.L. Cannabinoids attenuate cancer pain and proliferation in a mouse model. *Neurosci Lett* **488**, 247-51 (2011).
38. Vara, D. et al. Anti-tumoral action of cannabinoids on hepatocellular carcinoma: role of AMPK-dependent activation of autophagy. *Cell Death Differ* **18**, 1099-111 (2011).
39. Izzo, A.A. et al. Increased endocannabinoid levels reduce the development of precancerous lesions in the mouse colon. *J Mol Med (Berl)* **86**, 89-98 (2008).
40. Wang, D. et al. Loss of cannabinoid receptor 1 accelerates intestinal tumor growth. *Cancer Res* **68**, 6468-76 (2008).
41. Ramer, R. & Hinz, B. Inhibition of cancer cell invasion by cannabinoids via increased expression of tissue inhibitor of matrix metalloproteinases-1. *J Natl Cancer Inst* **100**, 59-69 (2008).
42. Grimaldi, C. et al. Anandamide inhibits adhesion and migration of breast cancer cells. *Exp Cell Res* **312**, 363-73 (2006).
43. McAllister, S.D. et al. Pathways mediating the effects of cannabidiol on the reduction of breast cancer cell proliferation, invasion, and metastasis. *Breast Cancer Res Treat* **129**, 37-47 (2011).
44. Zhu, L.X. et al. Delta-9-tetrahydrocannabinol inhibits antitumor immunity by a CB2 receptor-mediated, cytokine-dependent pathway. *J Immunol* **165**, 373-80 (2000).
45. Gardner, B., Zhu, L.X., Sharma, S., Tashkin, D.P. & Dubinett, S.M. Methanandamide increases COX-2 expression and tumor growth in murine lung cancer. *FASEB J* **17**, 2157-9 (2003).
46. McKallip, R.J., Nagarkatti, M. & Nagarkatti, P.S. Delta-9-tetrahydrocannabinol enhances breast cancer growth and metastasis by suppression of the antitumor immune response. *J Immunol* **174**, 3281-9 (2005).
